# Supplementary material for: Structural, spectroscopic and theoretical studies of diosmium(iii,iii) tetracarboxylates
Source: Royal Society of Chemistry journal article supplement (doi:10.1039/c3dt51449h), 2013-01-01
Supplement: c3dt51449h.pdf [file c3dt51449h.pdf]

**Supporting Information for**

**Structural, spectroscopic and theoretical studies of**

**diosmium(III,III) tetracarboxylates**

Raquel Gracia and Nathan J. Patmore\*

*The University of Sheffield, Department of Chemistry, Sheffield, S3 7HF, UK*

*Email: n.patmore@sheffield.ac.uk*

**Table S1.** Calculated atomic coordinates for Os<sub>2</sub>(O<sub>2</sub>CCH<sub>3</sub>)<sub>4</sub>Cl<sub>2</sub> in vacuum.

| Centre number | Atomic type | Atomic coordinates (Å) |            |            |
|---------------|-------------|------------------------|------------|------------|
|               |             | x                      | y          | z          |
| 1             | C           | -1.9262800             | 1.8212860  | -0.0212370 |
| 2             | O           | -1.5330870             | 1.3376380  | 1.0788750  |
| 3             | Os          | -0.0010240             | -0.0732050 | 1.1726650  |
| 4             | Os          | 0.0010240              | 0.0732050  | -1.1726650 |
| 5             | O           | 1.5330870              | -1.3376380 | -1.0788750 |
| 6             | O           | 1.4393950              | -1.4835390 | 1.1554370  |
| 7             | O           | 1.4985910              | 1.3726570  | 1.0823750  |
| 8             | O           | -1.4087100             | -1.5156990 | 1.1522660  |
| 9             | O           | -1.4985910             | -1.3726570 | -1.0823750 |
| 10            | O           | 1.4087100              | 1.5156990  | -1.1522660 |
| 11            | C           | 1.8908730              | 1.8579480  | -0.0171690 |
| 12            | C           | -1.8908730             | -1.8579480 | 0.0171690  |
| 13            | C           | 1.9262800              | -1.8212860 | 0.0212370  |
| 14            | Cl          | -0.0085510             | 0.5176660  | 3.4659390  |
| 15            | O           | -1.4393950             | 1.4835390  | -1.1554370 |
| 16            | Cl          | 0.0085510              | -0.5176660 | -3.4659390 |
| 17            | C           | -2.9919780             | 2.8681960  | -0.0069480 |
| 18            | H           | -3.6429330             | 2.7299680  | 0.8578710  |
| 19            | H           | -2.5163670             | 3.8520750  | 0.0775140  |
| 20            | H           | -3.5620780             | 2.8416970  | -0.9372360 |
| 21            | C           | -2.9896540             | -2.8700200 | 0.0067340  |
| 22            | H           | -3.9498500             | -2.3476700 | 0.0875720  |
| 23            | H           | -2.9799290             | -3.4267480 | -0.9316750 |
| 24            | H           | -2.8941220             | -3.5400910 | 0.8630290  |
| 25            | C           | 2.9896540              | 2.8700200  | -0.0067340 |
| 26            | H           | 3.9498500              | 2.3476700  | -0.0875720 |
| 27            | H           | 2.8941220              | 3.5400910  | -0.8630290 |
| 28            | H           | 2.9799290              | 3.4267480  | 0.9316750  |
| 29            | C           | 2.9919780              | -2.8681960 | 0.0069480  |
| 30            | H           | 2.5163670              | -3.8520750 | -0.0775140 |
| 31            | H           | 3.6429330              | -2.7299680 | -0.8578710 |
| 32            | H           | 3.5620780              | -2.8416970 | 0.9372360  |

**Table S2.** Calculated atomic coordinates for Os<sub>2</sub>(O<sub>2</sub>CCH<sub>3</sub>)<sub>4</sub>Cl<sub>2</sub> in a CH<sub>2</sub>Cl<sub>2</sub> solvent cavity using the polarizable continuum model.

| Centre number | Atomic type | Atomic coordinates (Å) |            |            |
|---------------|-------------|------------------------|------------|------------|
|               |             | x                      | x          | z          |
| 1             | C           | -1.9227940             | 1.8316090  | -0.0165540 |
| 2             | O           | -1.5125790             | 1.3542620  | 1.0841920  |
| 3             | Os          | -0.0004420             | -0.0628190 | 1.1641370  |
| 4             | Os          | 0.0004420              | 0.0628190  | -1.1641370 |
| 5             | O           | 1.5125790              | -1.3542620 | -1.0841920 |
| 6             | O           | 1.4432420              | -1.4651470 | 1.1473400  |
| 7             | O           | 1.4749890              | 1.3926340  | 1.0866850  |
| 8             | O           | -1.4077490             | -1.5013450 | 1.1451040  |
| 9             | O           | -1.4749890             | -1.3926340 | -1.0866850 |
| 10            | O           | 1.4077490              | 1.5013450  | -1.1451040 |
| 11            | C           | 1.8833800              | 1.8717940  | -0.0138510 |
| 12            | C           | -1.8833800             | -1.8717940 | 0.0138510  |
| 13            | C           | 1.9227940              | -1.8316090 | 0.0165540  |
| 14            | Cl          | -0.0085490             | 0.4718740  | 3.5117350  |
| 15            | O           | -1.4432420             | 1.4651470  | -1.1473400 |
| 16            | Cl          | 0.0085490              | -0.4718740 | -3.5117350 |
| 17            | C           | -2.9783360             | 2.8817850  | -0.0068210 |
| 18            | H           | -3.6215110             | 2.7629840  | 0.8662580  |
| 19            | H           | -2.4921480             | 3.8623660  | 0.0537520  |
| 20            | H           | -3.5608250             | 2.8430030  | -0.9285680 |
| 21            | C           | -2.9756960             | -2.8835760 | 0.0076720  |
| 22            | H           | -3.9358930             | -2.3577930 | 0.0645780  |
| 23            | H           | -2.9530090             | -3.4597620 | -0.9183490 |
| 24            | H           | -2.8910620             | -3.5380380 | 0.8765930  |
| 25            | C           | 2.9756960              | 2.8835760  | -0.0076720 |
| 26            | H           | 3.9358930              | 2.3577930  | -0.0645780 |
| 27            | H           | 2.8910620              | 3.5380380  | -0.8765930 |
| 28            | H           | 2.9530090              | 3.4597620  | 0.9183490  |
| 29            | C           | 2.9783360              | -2.8817850 | 0.0068210  |
| 30            | H           | 2.4921480              | -3.8623660 | -0.0537520 |
| 31            | H           | 3.6215110              | -2.7629840 | -0.8662580 |
| 32            | H           | 3.5608250              | -2.8430030 | 0.9285680  |
